# Supplementary material for: Pelvic pain
Source: HighWire-hosted journal article supplement (doi:10.1136/bmj.h5637), 2015-11-12
Supplement: bmj.h5637.pdf [file bmj.h5637.pdf]

# 10分钟会诊 盆腔痛

10-Minute Consultation

Pelvic pain

来源:BMJ 2015; 351: h5637 doi: 10.1136/bmj.h5637

28岁女性,主诉盆腔痛6个月,有痛经及性交痛。

## 你需要知道什么信息?

### 病史

对于任何一名主诉盆腔痛的女性,需要询问下列问题,尤其应注意寻找危险症状(见框图):

- 她是否能够准确描述疼痛部位? 她的月经周期是多少天? 周期规律吗? 月经量如何?
- 她痛经吗? 有无性交痛? 如果有,这些是新发症状吗? 原发性痛经(自初潮即开始痛经)极少由于病理性因素所导致<sup>1</sup>,因此无需特殊提及。
- 她是否担心性传播感染? 她是否阴道分泌物异常且可能提示存在感染?
- 了解她的肿瘤家族史,同时了解其他家庭成员是如何应对疼痛和月经周期的也非常有用。
- 她是否有性交后或月经间期的异常出血,从而提示可能存在宫颈病变?(见危险信号框图)。
- 她是否曾有由性侵犯、强奸、生殖器割礼或分娩所导致的生殖器损伤的病史? 如果有,她是否需要性心理咨询或外科手术? 如女性生殖器割礼修复术或外阴瘢痕切除修复术。询问前应仔细考虑如何问及这些敏感问题<sup>2</sup>。
- 疼痛出现和月经周期、排便以及性生活有什么关系? 疼痛日记对于清晰地反映周期性疼痛很有帮助,而“周期追踪应用程序”可用于监测症状。子宫内膜异位症和子宫腺肌症的特征性症状主要包括痛经、排便时直肠疼痛、性交疼痛和慢性盆腔痛等<sup>3</sup>。
- 是否还有其他相关症状提示可能存在不同的诊断? 然而,与此同时我们必须铭记子宫内膜异位症也可导致以下任何症状:
  - 肠道症状,如腹胀和肠胀气,表明可能存在肠易激综合征或炎性肠病。
  - 尿路症状,如尿频或排尿困难,提示可能是间质性膀胱炎。
  - 肌肉骨骼系统症状,如步行或抬举疼痛。
- 她的症状是否提示可能存在心理因素? 她抑郁或者焦虑吗?
- 她采用什么避孕方式? 近期放置宫内节育器可能导致她的症状,然而宫内节育器也可以做为治疗的选择<sup>3,4</sup>。

## 你需要知道

- 将所有发现盆腔包块、宫颈病变或持续性出血的患者转诊至妇科。
- 考虑子宫内膜异位症,并将以长期性交疼痛及直肠疼痛为表现,且药物治疗无效的患者进行转诊。

- 她是否有不孕不育、外科手术或盆腔炎性疾病史,从而提示她可能存在盆腔内的瘢痕或粘连? 不孕不育的病史也会增加患子宫内膜异位症的可能。
- 她的症状对她的生活质量产生了什么影响? 她还能有性生活吗? 她需要离开工作单位或学校一段时间吗? 严重的症状常提示子宫内膜异位症。

### 检查

- 检查腹部,看有无包块(危险信号)<sup>5</sup>或既往手术的瘢痕。
- 检查外阴有无皮肤病变。窥器检查宫颈有无异常,如肿物或溃疡伴接触性出血。必要时可以取宫颈细胞学涂片。
- 取宫颈管和核酸放大试验(NAAT)拭子以除外性传播感染。感染可以引起疼痛。
- 检查子宫的大小、形态、位置和活动度以及附件。子宫增大可能提示子宫肌瘤或子宫腺肌症。附件包块可能是卵巢囊肿或输卵管积水。恶性肿瘤很少见于28岁的青年女性,但并非绝对不可能。盆腔内器官触痛或活动度欠佳可能提示存在子宫内膜异位症,也可能在阴道后穹隆触及结节<sup>6</sup>。盆腔炎性疾病或既往手术引起的粘连也可能具有相同的体征。
- 骶髂关节或耻骨联合压痛,提示可能存在肌肉骨骼系统的病因。

## 框图 危险信号提示的严重病理异常

如存在下列情况需紧急转诊至妇科或胃肠道门诊:

- 持续的性交后或月经期出血<sup>5</sup>
- 盆腔包块<sup>5</sup>
- 宫颈外观异常<sup>5</sup>
- 直肠出血或排便习惯改变
- 突然体重下降

## 你该怎么做？

- 假设可以除外严重的病理状态或衰弱的症状,大多数患者可以在初级保健机构接受简单的止痛治疗,如对乙酰氨基酚和非甾体类抗炎药。
- 抑制排卵(假设患者无生育要求)可能对周期性症状有效,可以使用雌孕激素联合制剂或单纯的孕激素制剂(去氧孕烯 75 μg),或注射黄体酮类的避孕制剂(埋植或长效的针剂)<sup>3</sup>。
- 阴道超声检查可以协助医生及患者再次确认临床发现是否正常。如果发现子宫增大或盆腔包块则必须行阴道超声检查<sup>4</sup>。超声检查对于发现子宫肌瘤及卵巢囊肿的敏感性和特异性均很高。超声影像正常并不能除外粘连和子宫内膜异位症。
- 一些患者可能从局部理疗、改变饮食、补充维生素、经皮电神经刺激(TENS)以及成立自助团体中获益,但此类证据尚不充分。
- 宫内节育系统(曼月乐)是一项有益的选择,并可以做为子宫内膜异位症的治疗方法,尤其是以痛经为主要症状

的患者<sup>4</sup>。

- 如果症状严重并提示为子宫内膜异位症,且药物治疗无效,应转诊行腹腔镜检查。证据表明30%~50%的腹腔镜检查并未发现病理异常,而许多病理异常也并非疼痛产生的必要因素<sup>3</sup>。

Rachel Brown, *GPST gynaecology, NICE fellow*<sup>1</sup>,  
Sanjay Vyas, *consultant gynaecologist*<sup>2</sup>

<sup>1</sup>Montpelier Health Centre, Bristol BS6 5PT, UK

<sup>2</sup>Southmead Hospital, Bristol BS10 5NB

Correspondence to: R Brown Rachel.Brown@gp-181012.nhs.uk

利益竞争(Competing interests): We have read and understood BMJ policy on declaration of interests and declare the following: RB is a member of the NICE Guideline Development Group on Endometriosis.

来源与同行评议(Provenance and peer review): Not commissioned; externally peer reviewed.

参考文献1-6见bmj.com。

(本文特邀优秀译者:史阳阳 北京大学第一医院妇产科)

(本文英文原文见本刊2017年第1期第56页)

BMJ takes no responsibility for the accuracy of the translation from the published English language original and is not liable for any errors that may occur.

# BMJ
